# Supplementary material for: Autoimmunity and allergy control in adults submitted to complete thymectomy early in infancy
Source: PLoS One. 2017 Jul 7;12(7):e0180385. doi: 10.1371/journal.pone.0180385 (PMC5501530; doi:10.1371/journal.pone.0180385)
Supplement: S1 Table — Samples and antigens are in the same hierarchical order as shown in the corresponding heatmap figure. (XLS) [file pone.0180385.s001.xls]

## Sheet: IgG_heatmap_table
Antigen	Samples
	C1	C7	C3	C2	T1	T7	T5	T6	C5	C6	C4	T4	T3	T2
SNRNP-A	8.501558569	9.613771051	9.603311069	10.32666542	9.95930649	10.11383331	11.81910931	11.22646036	11.35902474	10.45426844	10.08189615	9.832415365	10.54490649	10.64850139
Histone H2A	8.574215066	9.503865481	9.452611907	10.50275226	9.870380133	10.18746343	11.81921711	10.91681996	11.02376821	10.06526802	9.973769105	9.86133509	10.71594484	10.39414111
Histone H2B	8.879767021	9.636515871	9.481900316	10.1911456	9.87519643	9.78303096	11.50585124	11.28234134	11.20598869	10.1250647	9.790837187	10.26745387	10.47973985	10.60537766
Ro-52/SSA	8.938256382	10.18701796	9.952915932	10.1438296	9.692510892	9.935150313	11.30513264	11.08057106	10.54434628	9.994070528	10.05966893	10.09834797	10.46857314	10.53850906
Collagen V	8.789305404	9.734726553	9.192317476	10.2356074	9.790739462	9.861273048	11.409009	10.59081158	10.99057202	9.762614579	9.764738923	9.858602712	10.3465913	10.45406277
PL-7	9.420212891	9.959480382	9.475064611	10.392736	10.04926319	9.970134658	11.59058705	10.85902999	10.90391949	10.15078813	10.25363479	10.7248634	10.55936753	10.41615361
CENP-B	9.113325443	10.19128134	9.067111634	10.40813864	9.832304591	10.18227019	11.64470803	10.55203502	11.30584515	9.912185776	10.71573039	10.48544695	10.52207145	10.66052187
Chromatin	8.104808394	9.13583752	8.87768291	10.09604306	9.675021976	9.797774992	11.4409003	10.88711397	10.96202839	10.33274149	9.627515645	10.9093456	10.20955084	10.36957554
TPO	9.836444911	9.227375274	9.228530123	10.21151115	9.925776946	10.13478567	12.87384972	10.98432588	10.93221475	10.25009704	9.853262765	10.16964946	10.41610081	10.35802476
Entaktin EDTA	9.352418676	9.713094337	10.0018726	9.976592762	9.628153873	9.729841634	11.35479484	10.60661804	10.67918097	9.995385585	11.46182729	10.21581205	10.63378537	10.58389135
PCNA	9.778225006	11.37507202	9.560753161	10.38028789	9.880486566	9.787739349	11.46807415	10.96173907	11.20646497	9.921989661	10.25486328	10.29096343	10.23596634	10.36220686
Topoisomerase I	9.249848246	10.87858742	9.148781613	10.3043285	9.986354046	9.817063593	11.50229479	10.62840908	11.17446385	10.06312539	10.22354322	9.925598944	10.37519151	10.48367472
Scl-70	8.45955457	11.17918134	9.033009957	9.924649226	9.751795086	9.570121343	11.35862923	10.45422731	10.71952573	9.713901978	9.648357582	9.531420452	9.985984208	10.07872457
complement C5	9.861567724	10.42485912	10.41638587	9.638653116	9.888256181	10.22970808	10.70126314	10.3893517	11.00180224	9.6109141	9.988258631	11.39957167	10.75394376	11.29184411
complement C1q	10.13432363	10.08560524	10.04870483	9.903279342	9.752915808	9.935312406	10.7617756	9.709807564	10.39907494	10.2604609	10.30717804	10.74812575	10.69312101	10.58625809
Thyroglobulin	9.998548121	10.27914624	10.1234748	10.20351931	9.464913269	11.14213897	10.46708584	9.731369949	10.42497456	9.07903137	9.715104009	11.42904576	10.21858745	10.06875141
La/SSB	8.746917346	9.231437209	8.788522589	11.31841288	9.943657652	9.896589735	11.20895979	10.30522956	10.81541532	9.619247925	10.06950347	12.37185558	10.43567026	10.48945663
SNRNP-C	8.483412734	9.320868226	8.785550552	9.632559052	9.047696513	9.370251481	10.81639971	10.61120927	10.27988911	9.58625809	9.456990909	9.38528003	9.886047092	10.03662696
Elastin	8.396390716	9.13044186	8.916596068	9.834692257	8.846932025	9.330177419	10.91831169	10.51519717	10.36481315	9.329684236	9.196651301	9.457668158	9.725212862	9.590905119
GBM (disso)	7.994410012	8.632740795	8.347842794	9.525383776	9.236755685	9.520500825	11.00617177	10.18720359	10.52123727	9.129798173	9.206086401	9.511396877	9.810314561	10.01510836
Histone-total	7.980710829	8.557731729	8.698982415	10.10899482	9.717213727	9.747236328	11.28988632	9.49813117	10.44895256	9.619761463	9.933705406	9.235080804	10.2432335	9.897936189
Histone H3	7.782736175	8.728260673	8.949943405	9.918520407	9.640859487	9.337309693	10.97527479	9.923193759	10.25620869	9.77262799	10.30568558	9.818118779	9.885574364	9.420318175
BPI	7.954138136	8.619046127	9.285332857	9.871335438	8.759322309	9.435232699	10.99230109	9.696341643	9.657282717	9.224363509	9.601027897	8.769870895	10.6229578	10.33145443
AGTR1	8.773007297	8.973926917	9.283412518	11.44299532	9.624740634	9.907010815	10.93171999	10.28733146	10.70838557	10.40563079	9.739729988	9.124121312	9.590848994	9.720090317
complement C3	9.571752644	9.830293359	9.220136447	9.644577357	9.237926947	9.288704612	10.28781625	9.610452772	10.3977281	9.534380706	9.896695681	10.79763721	10.239515	10.32096974
complement C9	9.477677328	9.470211457	9.041631776	9.674068654	9.444704333	9.488121312	10.21383328	9.38253757	10.00844263	9.443938115	9.77636723	10.26640005	10.23746095	10.18769848
T1F1 GAMMA	8.823016874	9.047178455	8.999633644	8.740016821	9.071918161	9.396540565	10.02245104	11.3920222	9.597568418	9.913801956	9.520206142	9.742124139	10.1391804	10.23978944
POLB	8.841469999	9.609252626	9.3971826	9.52344434	8.703003771	10.10631429	9.641907236	11.4673661	11.88107571	9.205035666	10.93167567	10.8109411	10.15342536	9.856550028
PM/Scl-75	7.821391338	9.530055131	8.776531731	8.674474776	8.473543412	8.746245575	13.04784985	9.639449246	10.01833929	9.752380647	8.938638658	10.90994557	9.08531311	9.488040952
KU (P70/P80)	9.201756367	9.242864461	8.59058705	8.666721092	8.72376332	8.349347584	11.95088391	11.20661148	9.391050215	8.922346535	9.202711559	9.724240977	9.348440472	9.640208778
Histone H1	8.322063341	9.084967793	7.922554671	8.765236364	10.22534001	9.7984556	11.11313658	9.841674413	9.091884919	10.01831147	8.534808661	9.326249701	9.049249571	9.581972575
FactorB	8.725843385	8.990416018	8.630667565	9.096741505	8.726388479	8.92919922	9.884475819	8.742915695	9.579391371	8.525207571	8.936137325	9.353742311	9.685572282	9.525442506
Collagen IV	8.674580702	8.529118164	8.329347878	8.729722697	8.639557775	9.045896145	9.841894518	9.232157069	9.195667484	8.488723866	8.86393845	9.126936731	9.184453876	9.316507819
complement C7	8.06754192	8.649579535	8.912440295	8.807870078	8.50422312	8.882734743	9.71082365	9.884078917	9.469417968	8.682959481	8.797661526	9.312361132	9.467259099	9.366431505
CENP-A	7.647458426	8.677895784	7.730164413	9.114991613	8.723865688	8.938403424	10.09541021	9.9035505	10.31999946	8.758656291	9.005736817	8.786106233	9.247096776	9.724803727
Aggrecan	8.569817642	8.350232021	8.537179566	8.974787405	8.696619847	9.624959908	10.37465915	9.119641492	9.563005553	9.521305982	9.441201261	8.420465559	9.410578549	9.180779419
Collagen VI	8.14684866	8.581012228	8.199525124	9.171076694	8.92294113	9.006017448	9.908992993	8.460496852	8.853652642	10.07305703	9.422485316	8.787869919	9.255099404	8.824004051
Cardolipin	7.660281193	7.886611112	8.077670274	9.151828382	8.815671486	8.858571633	10.17311494	9.273236126	8.771522483	9.001014038	8.845239126	8.347842794	9.210476536	9.033835928
SmD1	8.474273788	7.916416929	9.197167537	8.833396134	7.714108112	8.913009057	9.608790765	9.147611977	9.102763097	8.940842121	9.650585073	8.509972891	8.964976149	8.736909238
complement C4	8.897694222	9.341518823	8.917043818	8.7809334	9.542374142	9.47323898	10.2376163	9.767754099	10.23952693	8.375777972	9.135042286	10.08433007	10.06752848	10.29909351
complement C3b	9.097610797	9.004473302	8.689299161	8.413543311	9.272909666	9.240624399	10.14815877	9.418442971	10.08510062	7.600210274	9.056935706	10.34101838	9.840526177	9.808932007
TNFa	8.996360498	8.948776035	8.715618859	8.533952624	8.48695566	8.526460115	9.484017257	8.844015239	10.81042704	8.458037433	9.694462363	10.10568593	9.382926583	9.237042613
Factor P	7.750472519	8.934988202	9.184503466	8.628919374	8.229539858	10.06104711	9.275402877	9.415171337	10.21499902	8.922762777	8.925495099	10.39289696	10.06809304	10.2135903
Intrinsic Factor	10.37339808	8.993447932	9.89067468	8.741837725	9.280585203	9.268635565	10.23032072	9.894787454	9.108106224	9.137554755	9.609917445	10.15590605	9.265896292	9.119408057
M2	10.88609283	9.020674427	8.328630053	8.6574971	8.350806615	8.18730258	10.30299299	8.905146285	8.974328542	8.830705335	8.916446787	10.29473561	9.077883864	9.137477907
dsDNA	8.857047916	8.881450499	8.276450138	7.930145948	8.76897825	7.952974156	8.517511923	8.025582548	7.907010815	10.07887131	9.580767332	10.47245731	8.856487779	8.840274387
FactorH	8.149543909	10.66588659	8.119926751	8.027076623	8.651661657	8.884384236	10.71689661	10.11795472	9.457237218	7.599392188	10.92344634	13.85261826	9.569513877	9.703263387
Vitronectin	11.67345484	9.379659947	10.03905612	9.985101904	9.259978594	9.876593684	10.16192546	9.768465557	10.13032602	10.17128941	11.23648664	11.26268214	12.6264437	12.69538273
Gliadin (IgG)	11.09978174	8.688530077	8.470943522	9.624046047	8.741163584	9.706755006	10.84599961	9.575822842	10.01683614	9.786923022	10.45002555	10.8116396	12.11299002	12.07908139
Muscarinic receptor	11.69600686	8.17990909	9.725298084	9.213954758	8.063449013	9.752698423	8.706357872	9.264278382	9.24583789	9.557770014	11.1867271	11.4399711	13.01906074	13.07469508
complement C8	8.982223552	9.108236935	8.710840865	8.927274264	9.116733826	8.896090168	10.49330508	9.566586861	9.931564876	9.406566431	9.233475879	10.2663532	11.24351914	11.0638467
Nucleosome antigen	8.300535603	8.487639087	8.405311683	9.335881591	8.7669595	8.689054497	10.02961853	8.770234406	9.361351665	9.663059924	9.798018103	10.41526642	12.00969218	11.73209533
Mitochondrial antige	8.498809325	8.557042415	7.921840937	7.694601653	8.588752108	8.442404457	9.93321853	8.714176816	8.984019633	7.866598937	9.649148376	10.55570114	13.67067727	13.71591803
Prothrombin protien	7.690417096	7.715893371	7.345094718	8.342830273	7.509933316	7.672425342	8.924693758	8.010947636	8.44762052	7.995088741	8.054739967	8.099558215	8.298154237	8.272536479
complement C3a	6.9202933	7.510882822	6.991975274	8.116083993	7.459759467	7.988457473	8.986666911	8.046905719	8.425006041	7.795650077	8.086667018	7.869069412	8.390254956	8.342963574
Histone H4	7.303689435	7.482606308	7.922257325	7.846869361	7.756889855	7.987036574	9.110613806	8.195741293	8.344695368	8.012401064	8.06010144	7.993447932	8.257340695	8.311203371
Vimentin	7.035513944	7.753885283	7.54874486	7.832003877	8.069798818	7.63321322	8.66987716	8.317729158	7.971830915	8.564492494	8.304100297	7.652056204	7.993957349	8.101082735
PL-12	7.077777073	8.107164756	7.167016644	7.937638646	7.965264821	7.522071447	8.833965307	8.260825467	8.351955117	7.939814257	8.172577521	8.095871689	7.806001761	8.174176684
MPO	6.907491593	7.079484784	7.401476879	7.603700518	7.746043983	7.548436625	8.79370084	8.154969964	8.109360559	7.441284272	7.919697613	7.613457984	7.991521846	8.022256832
Alpha Fodrin (SPTAN1)	6.796493929	8.404886096	7.615077832	7.278356528	8.636805852	7.530913484	8.325080544	8.054794223	8.33400506	8.617504198	7.987320866	7.493134922	8.029011087	8.070979596
SmD3	7.69132478	7.240695944	7.918386234	6.875657213	8.780244473	8.344650989	9.08722414	8.579504513	8.542335445	7.823621998	8.162542388	8.172477515	8.433501986	8.465933664
SmD	6.51080372	6.962549023	9.336841253	7.028569152	7.609991295	7.265661925	8.333200084	8.259413736	8.183089461	8.101870648	7.749400182	7.580899204	7.424250286	7.971658505
SRP54	8.343585483	7.321296778	6.935459748	7.988343852	7.247168	7.481638002	8.506843099	7.575236684	7.811727898	8.098032083	8.393090088	9.556965805	8.655494946	8.681906009
Glycated Albumin	7.433209853	7.158458216	7.234865321	7.851624127	6.906770366	7.653991505	8.570159302	7.240028052	7.790185563	7.789272795	7.929258409	8.345050351	8.075158218	8.155526627
alpha-actinin	6.480426705	7.794415866	7.289834465	8.667147032	8.078577814	8.730028515	10.06931549	9.533894239	9.926725922	8.482001193	8.362469889	7.94976836	8.68877483	9.168396338
DGPS	6.439789337	7.447827118	7.374083112	9.08841725	8.265661925	8.93799167	10.32657555	9.384459998	9.306175642	8.468501862	8.377817853	7.828644274	8.746447139	8.462256861
Nucleolin	6.497931652	7.859969548	7.319581809	8.330289483	8.01664117	8.051100157	9.68469603	9.333065878	9.338803224	8.004332843	8.097610797	7.945502362	8.388921378	8.478486512
SNRNP-BB'	6.814678589	7.992655149	7.424754167	8.258047748	7.731454808	8.05278539	9.40915754	9.089265084	9.008400608	8.103602544	8.068133354	7.458037433	7.997744026	8.302181941
MDA5	7.739915592	8.147357583	8.080177964	8.101975671	8.107949355	8.422317111	9.228457972	8.883162571	8.72389981	10.19849415	8.486312138	8.880195729	8.943071536	8.948279616
GP2	8.254603491	7.755421735	8.065550771	8.559377091	8.169073159	8.106903128	9.408860436	8.339671881	8.7473874	8.626548649	8.310203771	8.307883849	8.471350063	8.448364134
Cytochrome C	6.736875423	8.269641001	7.133604623	9.046605649	8.15598192	7.948717641	7.043519494	9.592942837	9.865439445	8.676133391	8.577655412	8.783456654	8.946760097	8.473340464
ssRNA	6.366671916	7.232372956	7.009100789	8.367676837	7.717265145	8.142872887	9.572434966	9.637965196	8.659139651	11.19269967	8.095080492	8.848278655	8.051535244	8.13873257
Hemocyanin	7.061020096	7.06608919	7.608069968	8.087728018	8.378034692	9.414431553	9.219289547	8.745640714	8.741197299	8.636697116	10.3429969	7.740320465	8.174775914	7.514437914
Ribo phasphoprotein P2	8.089476964	6.842601772	9.060831009	8.352882087	7.640751056	8.352131729	8.998646839	8.760586897	8.218345272	8.479941901	9.289465631	7.562776657	8.1404208	8.257010618
Laminin	8.507873907	6.919459269	8.339538276	7.885696373	7.158256229	7.284292026	9.206672525	8.18646094	9.245766599	9.731369949	11.61153666	8.828707735	8.479982308	7.830673649
Heperan Sulfate	7.212569339	6.796493929	7.794805731	7.312701473	7.153400028	7.490650349	8.299391206	8.111813812	8.889716892	8.140931995	11.01658546	8.757590023	7.716030607	7.914504729
Ribo phasphoprotein P0	6.344473459	5.595145568	7.746514321	7.079058046	6.535430915	6.553206886	8.002815016	6.530757457	10.52847365	9.362930082	10.9033622	6.933100475	7.32813634	7.320484678
SmD2	8.038041037	5.956056652	8.573533585	5.409390936	8.863969415	8.644072578	9.610655774	8.885421839	8.502434039	7.114991613	8.421181213	8.749266084	9.143561786	8.896211291
Fibronectin	7.191799501	7.235535607	6.895302621	6.486392594	8.664340612	7.914265526	9.54731872	8.784405828	9.119200527	5.247547807	8.131959823	9.140804214	8.892573173	9.284800971
SP100	6.177917792	6.407692649	6.696550301	6.723148957	7.63088594	6.662632775	7.848435159	7.407097775	7.190516096	7.23964626	7.644721547	6.699607154	7.078737909	7.314968365
Ro-60/SSA	6.605849867	6.56422572	6.596637034	6.880685525	6.957218149	6.823494625	7.836492251	7.235631336	7.345627012	6.798569004	7.331185678	6.343940739	6.666046429	6.982765463
A100	5.828326926	6.155020578	6.067810784	6.732811872	6.969357739	7.64954361	8.084542674	7.081403545	6.406502657	6.741197299	7.019590728	6.453846774	7.285124751	6.937697489
Collagen III	6.011674533	6.247737673	6.312156888	6.416670877	6.695576306	6.767522386	7.569096095	7.155121802	6.774128144	7.022589749	7.082042565	6.732540561	6.852123719	6.941223713
Phophatidylinositol	5.123914459	5.267161218	5.736875423	7.198690586	6.426264755	6.991521846	7.919280485	7.203005338	7.446752485	7.112700133	7.525833979	6.091911357	7.044612693	6.71616783
Proteoglycan	5.798569004	5.215290306	5.7322692	6.485426827	6.726967417	6.894332742	7.331006484	6.995032192	7.153805336	6.485909792	7.465729643	6.414642958	6.756756451	6.538072503
Ribo phasphoprotein P1	6.193377511	5.119771162	5.350497247	6.436961338	7.076067339	6.6114675	7.938756261	7.104651167	7.280677989	6.236683945	6.936048964	6.888986721	7.373648211	7.492814573
Heparin	5.508111681	5.201633861	6.521050737	6.024142346	6.277426897	6.155020578	7.229203358	7.104022084	6.76540214	7.061776198	8.831528936	7.905928478	6.380417773	6.42508999
gP210	5.978653265	6.430619811	6.732540561	6.973266861	7.56673906	7.160678213	8.356099782	7.645226099	7.44567705	7.856674516	7.592905474	6.602735976	7.593353771	7.75788999
PR3	5.838447593	6.535119822	6.792334806	7.232085099	6.927777962	7.244221105	8.440952198	8.074462621	7.846430632	7.495375381	7.355174879	6.464014725	7.363083447	7.433376793
Sm	6.212763864	6.064796646	6.752347192	6.925999419	6.8928767	7.305970521	8.121896088	7.873013393	7.890081838	7.025914699	7.731726323	7.637856547	7.862513383	8.748930784
Genomic DNA	6.818773885	6.148120631	6.415657274	6.547665748	6.84899843	7.501200269	8.032431496	7.14404637	7.106536769	8.937462101	8.165007459	7.555969495	7.27817065	7.290018847
Mi-2	7.99384416	6.621905346	6.442114122	6.521207816	6.375560793	6.438625538	7.678001459	7.345715709	7.495215464	7.157650097	7.082042565	7.716236436	6.855242251	7.030777472
LKM1	5.74092756	7.114679353	7.364659972	5.726831217	7.572662335	5.012121673	6.981966786	8.342785837	7.25446177	6.585713709	6.406842755	8.44580118	8.148425737	8.311612098
SNRNP-68	5.546585829	5.357552005	6.10076745	6.179311989	6.421559945	6.192194165	7.51412226	6.87491989	6.86133509	6.510329019	6.276124405	6.167719199	6.753283616	6.376081967
Decorin-bovine	5.6114675	5.341985747	5.736875423	5.947666157	6.041549645	6.268658955	7.235822777	6.512700963	6.259272487	6.349436052	6.621758857	6.045486656	6.158458216	6.322288724
Myelin basic protein	4.615298579	5.848497755	6.066519781	6.611024797	6.352617299	6.535741941	7.660209873	7.328674927	7.032431496	6.333423734	6.454504938	5.872089989	6.496334513	6.698079537
Chondroitin Sulfate	4.222650022	5.147713722	5.376776572	5.947198584	5.869624686	6.167919866	7.096767855	7.203788453	6.808385051	6.558726823	6.385776138	5.280213996	6.153805336	6.561326136
Amyloid	4.995936704	4.822220272	5.226123143	5.625270489	5.560714954	6.245457633	6.842727469	6.564530601	6.269781238	6.174326515	6.217036793	5.300123725	5.849999259	6.314877757
Collagen I	4.866907978	4.174725988	5.350497247	6.33467553	6.373648211	6.353146825	7.243554843	8.031604721	7.64918431	7.504620392	5.805292456	6.08236197	6.421054947	6.624685811
Nup62	4.615298579	6.235535607	5.389910925	5.489286023	6.466463984	5.383704292	7.021146554	5.991861931	5.877498873	6.301770532	6.602884409	8.444145241	6.17332735	6.114991613
FactorD	4.524815928	1.752748591	3.092545742	5.015693807	6.035183997	6.599912842	7.223519087	6.594697827	6.149137401	4.538538164	5.928607199	5.461724992	6.132988043	5.858229714
Sphingomyelin	3.961623328	1.713695815	4.244887059	4.843481425	5.739037979	5.303780748	6.677226328	6.00270252	5.370513052	4.160274831	6.054197294	4.462052319	5.358255587	5.244125943
Collagen II	4.419538892	4.304511042	4.225737653	4.681449265	5.921959917	5.278356528	5.873321063	5.621172753	5.225737653	6.015247774	5.28872768	5.367720513	5.375387027	5.082787732
Fibrinogen IV	9.871243016	10.67261981	9.966144913	10.89564344	10.26511101	10.76703401	12.09277035	10.87456646	11.11874645	11.25022735	10.93665266	11.36265618	11.51343153	11.44690753
Myosin	10.05251371	11.04640784	10.37183108	10.87015662	10.3358481	10.29539013	11.7728795	11.14709042	11.07989807	10.95592593	11.14286013	11.83029732	10.92326805	11.12148819
TTG	9.679022587	10.62952966	9.847120002	10.80679931	10.83070534	10.39721469	12.0323695	11.53543578	11.63425292	10.45427873	10.63496529	11.62704591	11.68487132	11.72343911
b2-glycoprotein I	10.11949884	10.25032211	10.1461486	11.40036715	10.45790409	10.71530139	12.27018727	11.50434728	11.89766397	10.67534843	10.5700644	10.60086069	11.06655342	11.20175637
LC1	9.90263137	9.599354991	9.231725196	10.63364009	10.25268908	10.39405534	11.83053105	11.11809752	11.09397869	10.85004616	10.22321739	10.52594162	11.55582574	11.59371791
PM/Scl-100	10.07827092	10.82182181	10.8864587	11.84674794	10.3470455	11.79999389	11.57127862	10.45892946	11.11040501	10.76027085	10.42306337	11.27013761	10.95583877	10.92736316
Jo-1	9.8382112	11.05424479	10.63256814	10.57814622	10.29668683	11.26325159	11.75411502	11.09857168	11.17149583	11.53299871	10.47737377	10.65869349	10.92952473	10.98201672
AQP4	11.53373854	10.96969589	10.66922169	10.89383998	10.4576579	11.03312011	10.60674757	11.6800342	11.3162193	10.49314493	11.29464946	11.27774071	11.44465257	11.27842042
Peroxiredoxin 1	10.59634818	11.43330376	10.97257779	10.70455212	9.9437309	10.25696346	11.32651375	11.26370934	10.92482735	12.53885095	10.84690069	11.34206355	11.05276502	11.20287682
complement C6	9.073686367	10.80517958	11.57829249	9.377709421	9.320732868	9.466239641	10.97139985	10.88074674	10.58624871	9.999196714	9.55284198	12.23358672	11.39690977	11.74980659
ssDNA	11.53163976	11.85236565	11.13955135	11.27452376	11.36779148	11.08741643	11.77828662	11.31291131	11.20433883	11.70747561	11.56565429	12.84558022	11.86274195	12.08017463
CRP antigen	11.51230097	11.62984836	11.39659408	10.28824319	10.61600658	10.88738057	11.68114176	10.51762018	11.56441628	10.73817672	11.48191545	11.94870669	12.39611238	12.2666548
Sm/RNP	12.30846702	10.95667381	10.84229534	10.68532698	9.80464733	10.42952182	10.54497409	10.08490138	10.88407128	10.65750603	12.06505592	11.93048603	13.21582115	13.38382982
Fibrinogen S	11.85197152	12.36773143	11.77882457	11.99264099	11.55718126	11.80594535	13.18508448	11.19195985	12.81896956	12.84921742	13.17613262	12.9885054	13.39161952	13.62065628
b2-microglobulin	11.54798378	12.47972217	13.07309218	11.43709663	11.8228775	11.39461274	12.59340513	11.24750034	12.47750785	11.70525223	11.57007389	13.30909403	12.54954404	12.48186753
Heparan HSPG	10.5331545	10.05281255	11.03895327	10.9891461	10.59322303	10.69636773	12.21360245	11.32175338	13.61565837	12.44158255	14.64155506	11.13791332	11.10032068	11.24040378
Matrigel	10.59893646	9.875595783	11.01800539	10.50037385	10.18455306	10.50826027	12.31798065	11.30266177	13.08389645	12.40897451	14.1920377	10.88112926	10.68352102	10.83219381
EBNA1	12.19838672	13.14655754	14.99271489	12.82420698	12.32240985	15.03269493	11.07652168	13.79486968	13.27122519	14.33484799	12.6213193	14.97359244	13.50286909	13.54556905
